# Supplementary material for: Extensive screening of microRNA populations identifies hsa-miR-375 and hsa-miR-133a-3p as selective markers for human rectal and colon cancer
Source: PubMed Central journal article supplement (PMC6007480; doi:10.18632/oncotarget.25535), 2018-06-05
Supplement: oncotarget-09-27256-s001.pdf [file oncotarget-09-27256-s001.pdf]

## Extensive screening of microRNA populations identifies hsa-miR-375 and hsa-miR-133a-3p as selective markers for human rectal and colon cancer

### SUPPLEMENTARY MATERIALS

**Supplementary Table 1: Significantly expressed miRNAs in colon and rectal cancer tissues when compared to normal tissue at  $P_{adj} < 0.05$  and a mean expression  $\geq 10$  read counts.** The table illustrates a direct comparison for rectal cancer vs. colon cancer tissue of miRNAs significantly differentially expressed in rectal cancer (upper part), colon cancer (in the middle) or in both cancer types (lower part). Sections with significant deregulation were highlighted. Illustrations of these results are visualized in the matrix diagram (see also Figure 1). See Supplementary\_Table\_1

**Supplementary Table 2: Clinical characteristics of patients with colon or rectal cancer**

| #  | Entity | Sex | Age | Grading | T* | N* | M* | UICC |
|----|--------|-----|-----|---------|----|----|----|------|
| 1  | colon  | m   | 46  | 2       | 3  | 0  | 0  | IIA  |
| 2  | colon  | m   | 60  | 2       | 2  | 0  | 0  | I    |
| 3  | colon  | f   | 70  | 2       | 3  | 1b | 0  | IIIB |
| 4  | colon  | m   | 68  | 2       | 3  | 0  | 0  | IIA  |
| 5  | colon  | m   | 54  | 3       | 1  | 0  | 0  | I    |
| 6  | colon  | m   | 41  | 2       | 2  | 0  | 0  | I    |
| 7  | colon  | m   | 76  | 3       | 3  | 1a | 1b | IV   |
| 8  | colon  | f   | 71  | 2       | 3  | 0  | 0  | IIA  |
| 9  | colon  | m   | 79  | 2       | 4b | 1a | 0  | IIIC |
| 10 | colon  | m   | 44  | 3       | 3  | 2a | 0  | IIIB |
| 11 | colon  | m   | 73  | 2       | 2  | 1a | 0  | IIIA |
| 12 | colon  | m   | 63  | 2       | 1  | 0  | 0  | I    |
| 13 | colon  | f   | 64  | 3       | 3  | 1b | 0  | IIIB |
| 14 | colon  | f   | 84  | 2       | 3  | 0  | 0  | IIA  |
| 15 | colon  | f   | 67  | 2       | 3  | 1c | 0  | IIIB |
| 16 | rectum | f   | 44  | 2       | 3  | 0  | 0  | IIA  |
| 17 | rectum | m   | 80  | 2       | 2  | 0  | 0  | I    |
| 18 | rectum | f   | 50  | 2       | 3  | 2b | 0  | IIIC |
| 19 | rectum | f   | 55  | 2       | 2  | 0  | 0  | I    |
| 20 | rectum | m   | 61  | 2       | 4a | 2a | 0  | IIIC |
| 21 | rectum | f   | 77  | 2       | 3  | 1a | 0  | IIIB |
| 22 | rectum | f   | 45  | 2       | 3  | 0  | 0  | II   |
| 23 | rectum | m   | 71  | 3       | 3  | 0  | 0  | IIA  |
| 24 | rectum | f   | 67  | 2       | 3  | 1c | 0  | IIIB |
| 25 | rectum | m   | 58  | 3       | 2  | 2a | 0  | IIIB |
| 26 | rectum | m   | 48  | 2       | 3  | 0  | 0  | IIA  |
| 27 | rectum | m   | 76  | 2       | 1  | 0  | 0  | I    |
| 28 | rectum | f   | 65  | 2       | 3  | 2a | 1a | IVA  |
| 29 | rectum | f   | 62  | 2       | 3  | 2a | 0  | IIIB |

|    |        |   |    |   |    |    |    |      |
|----|--------|---|----|---|----|----|----|------|
| 30 | rectum | f | 50 | 2 | 3  | 1b | 1a | IVA  |
| 31 | rectum | f | 70 | 3 | 3  | 1  | 0  | III  |
| 32 | rectum | m | 59 | 2 | 3  | 1a | 1a | IV   |
| 33 | rectum | m | 49 | 2 | 2  | 0  | 0  | I    |
| 34 | rectum | f | 76 | 2 | 3  | 1a | 0  | IIIB |
| 35 | rectum | f | 67 | 2 | 4a | 0  | 0  | IIB  |
| 36 | rectum | m | 64 | 2 | 2  | 0  | 0  | I    |
| 37 | rectum | m | 76 | 2 | 0  | 0  | 0  | I    |
| 38 | rectum | f | 52 | 3 | 4b | 2  | 1b | IV   |
| 39 | rectum | f | 77 | 2 | 2  | 0  | 0  | I    |
| 40 | rectum | f | 55 | 3 | 4b | 1a | 1  | IV   |
| 41 | rectum | m | 57 | 2 | 3  | 0  | 0  | IIA  |
| 42 | rectum | m | 47 | 2 | 1  | 1a | 0  | IIIA |
| 43 | rectum | m | 81 | 2 | 3  | 0  | 0  | IIA  |
| 44 | rectum | f | 42 | 2 | 2  | 1  | 0  | IIIA |
| 45 | rectum | m | 46 | 2 | 3  | 1b | 1a | IV   |
| 46 | rectum | m | 82 | 2 | 2  | 0  | 0  | I    |
| 47 | rectum | m | 76 | 2 | 2  | 1  | 0  | IIIA |
| 48 | rectum | m | 52 | 2 | 2  | 1a | 0  | IIIA |
| 49 | rectum | f | 61 | 2 | 3  | 0  | 1a | IVA  |
| 50 | rectum | f | 80 | 2 | 2  | 0  | 0  | I    |

The table shows additional clinical data of patients including tumor entity, sex and age of the patients, tumor grading, TNM stage according to the TNM Classification of Malignant Tumors (Primary tumor (T), regional lymph nodes (N), distant metastasis (M)) and UICC stage.
